# Supplementary material for: Evaluation of Advanced Backcrosses of Eggplant with Solanum elaeagnifolium Introgressions under Low N Conditions
Source: MDPI journal article supplement (doi:10.3390/agronomy11091770), 2021-09-03
Supplement: s1 [file s1]

## Supplementary data

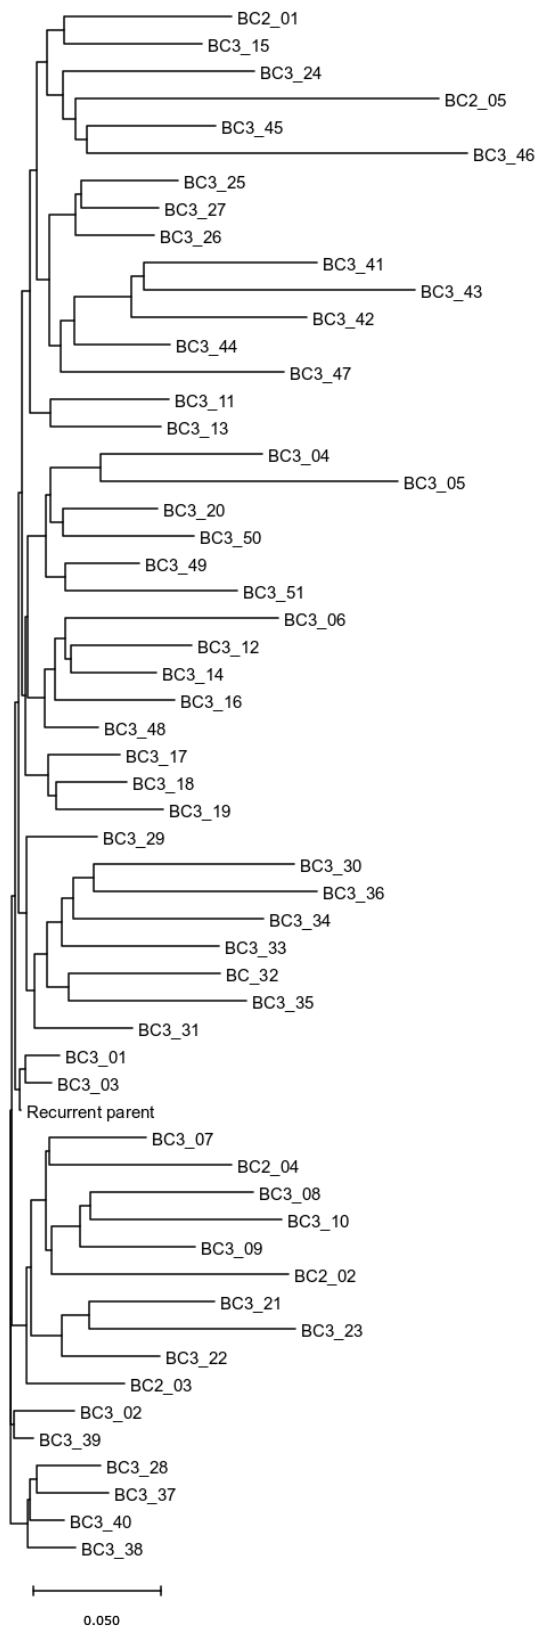

**Figure S1.** Neighbor-joining dendrogram based on IBS distances of 56 individuals of advanced backcrosses (BC2 and BC3) individuals with introgressions from *S. elaeagnifolium* and the recurrent parent (*S. melongena*).

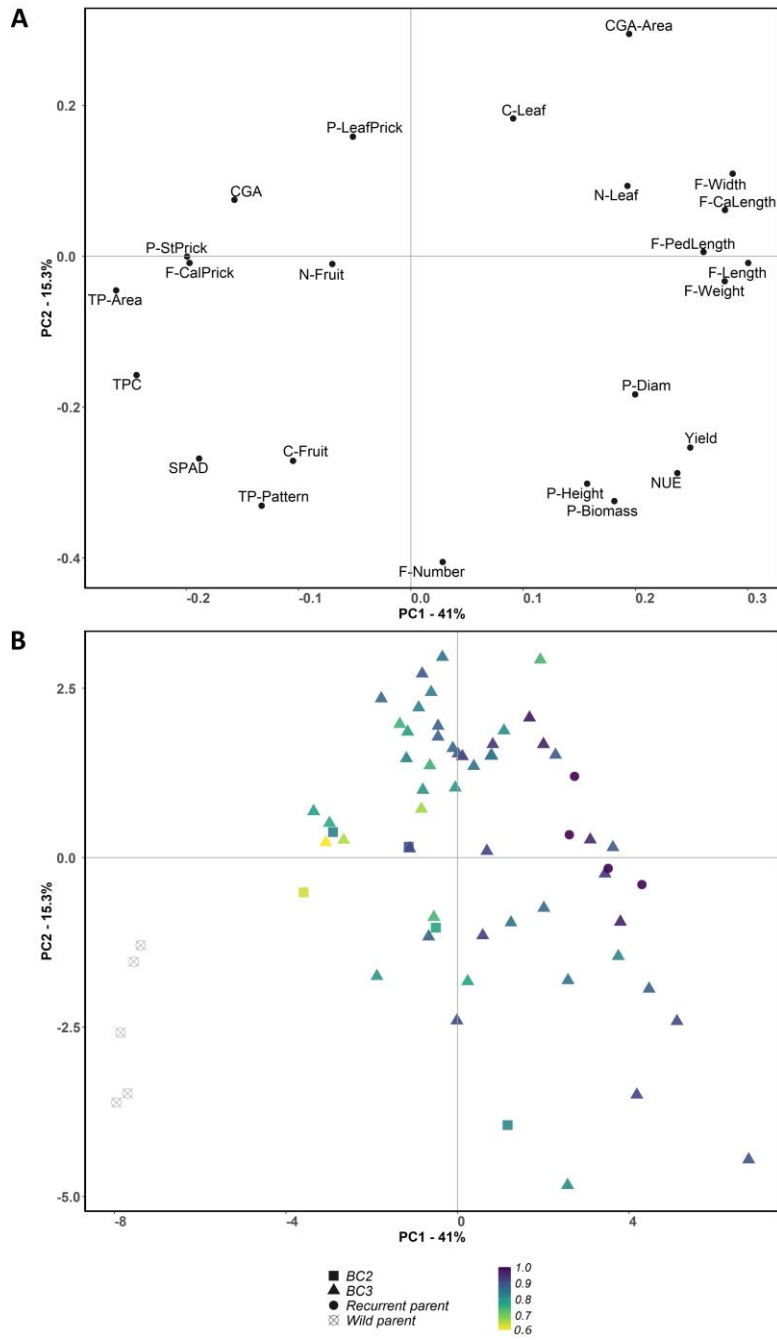

**Figure S2.** PCA loading plot (A) and score plot (B) evaluated in the present study based on the two first principal components of PCA. First and second components account for 40.1% and 14.7% of the total variation, respectively. The accessions are represented by different symbols according to the generation (BC2, BC3 and recurrent parent) and gradient of color according to homozygous proportion from recurrent parent (1: dark purple to 0: yellow). The full name of each trait abbreviation can be found in Table 1.
